# Supplementary material for: The synergy effect on Li storage of LiFePO4 with activated carbon modifications
Source: Royal Society of Chemistry journal article supplement (doi:10.1039/c3ra44218g), 2013-01-01
Supplement: c3ra44218g.pdf [file c3ra44218g.pdf]

# Electronic Supplementary Information

## The synergy effect on Li storage of $\text{LiFePO}_4$ with activated carbon modifications

*Bo Wang,<sup>ab</sup> Qiuming Wang,<sup>a</sup> Binghui Xu,<sup>b</sup> Tiefeng Liu,<sup>a</sup> Dianlong Wang\*<sup>a</sup> and George Zhao\*<sup>b</sup>*

<sup>a</sup> Harbin Institute of Technology, School of Chemical Engineering and Technology, Xidazhi Street, 150001 Harbin, China. Fax: 86 45186413721; Tel: 86 451 86413751; E-mail: [wangdianlongwbhit@163.com](mailto:wangdianlongwbhit@163.com)

<sup>b</sup> The University of Queensland, Faculty of Engineering, Architecture and Information Technology, School of Chemical Engineering, St Lucia, Brisbane, QLD 4072, Australia. Fax: 61 7 33654199; Tex: 61 7 33469997; E-mail: [george.zhao@uq.edu.au](mailto:george.zhao@uq.edu.au)

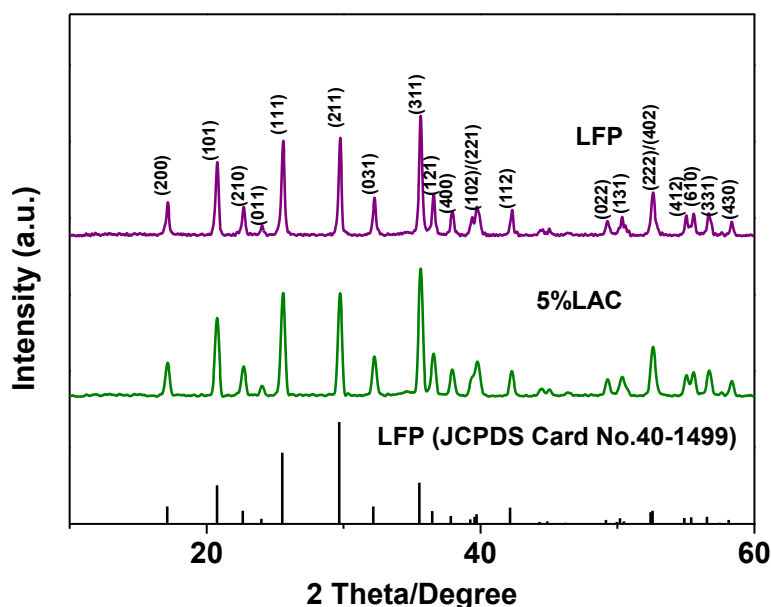

Fig. S1† XRD patterns of LFP, 5%LAC and standard LFP (JCPDS Card No. 40-1499).

Supplementary Material (ESI) for RSC Advances  
This journal is © Royal Society of Chemistry 2013

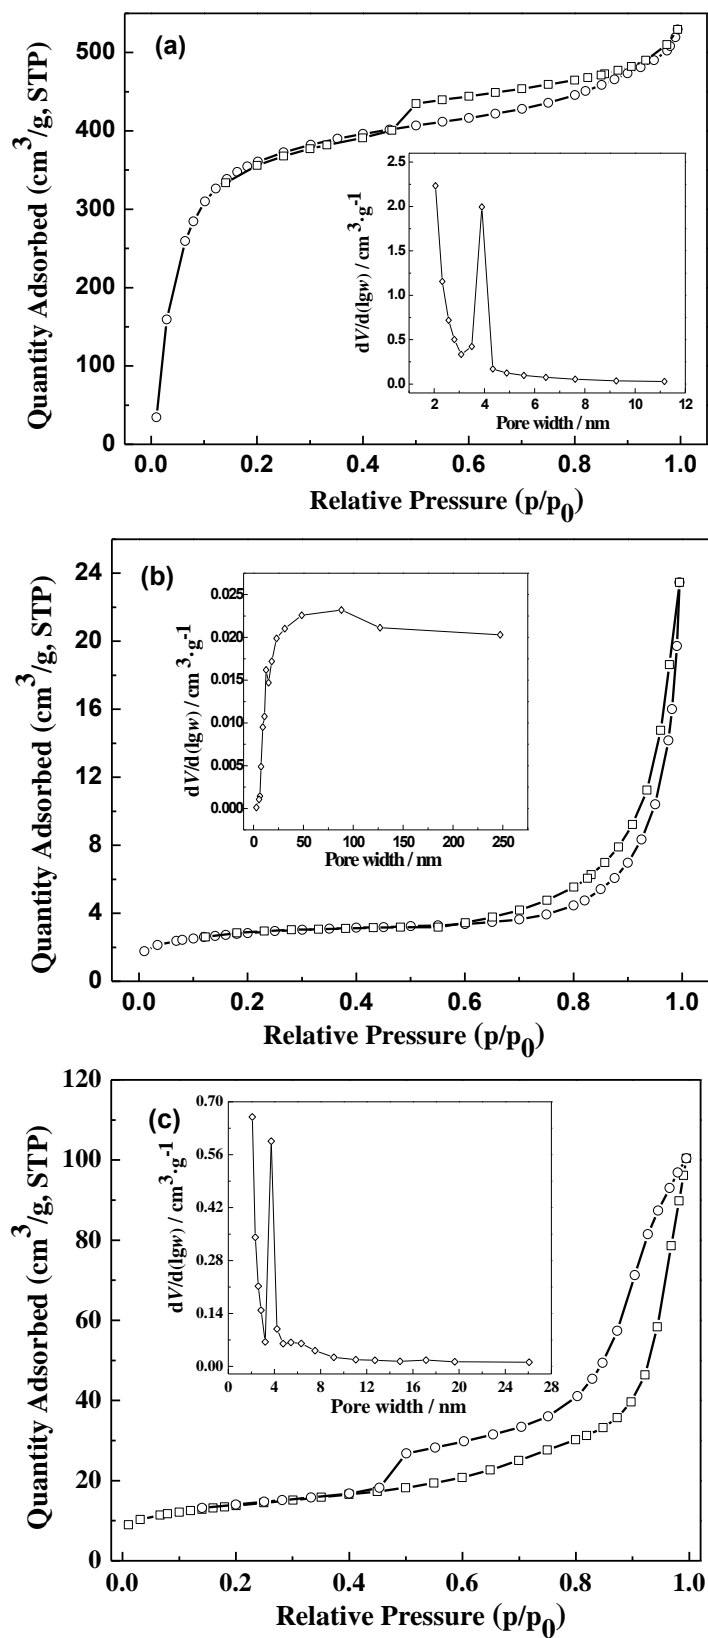

Fig. S2† The nitrogen adsorption/desorption isotherms and pore-size distributions of (a) AC; (b) LFP; (c) 5%LAC.

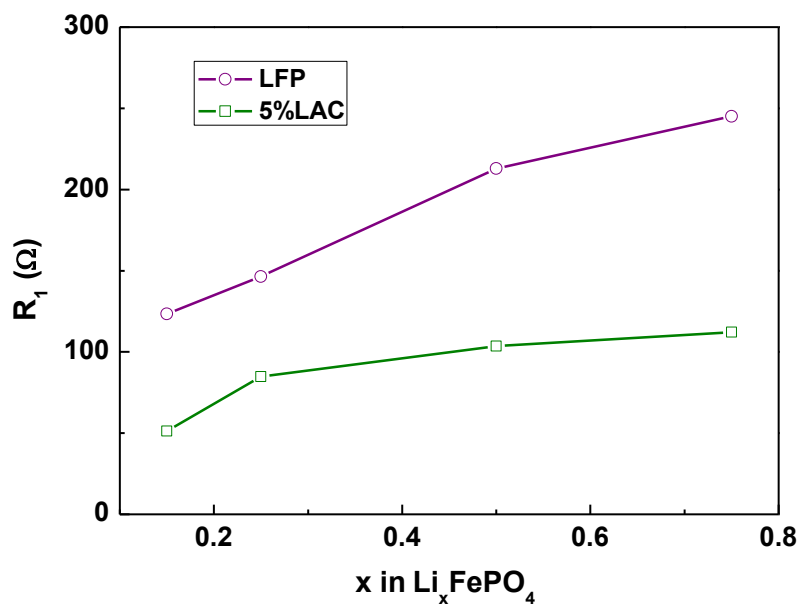

Fig. S3†  $R_1$  of electrodes LFP and 5%LAC at different SOCs.

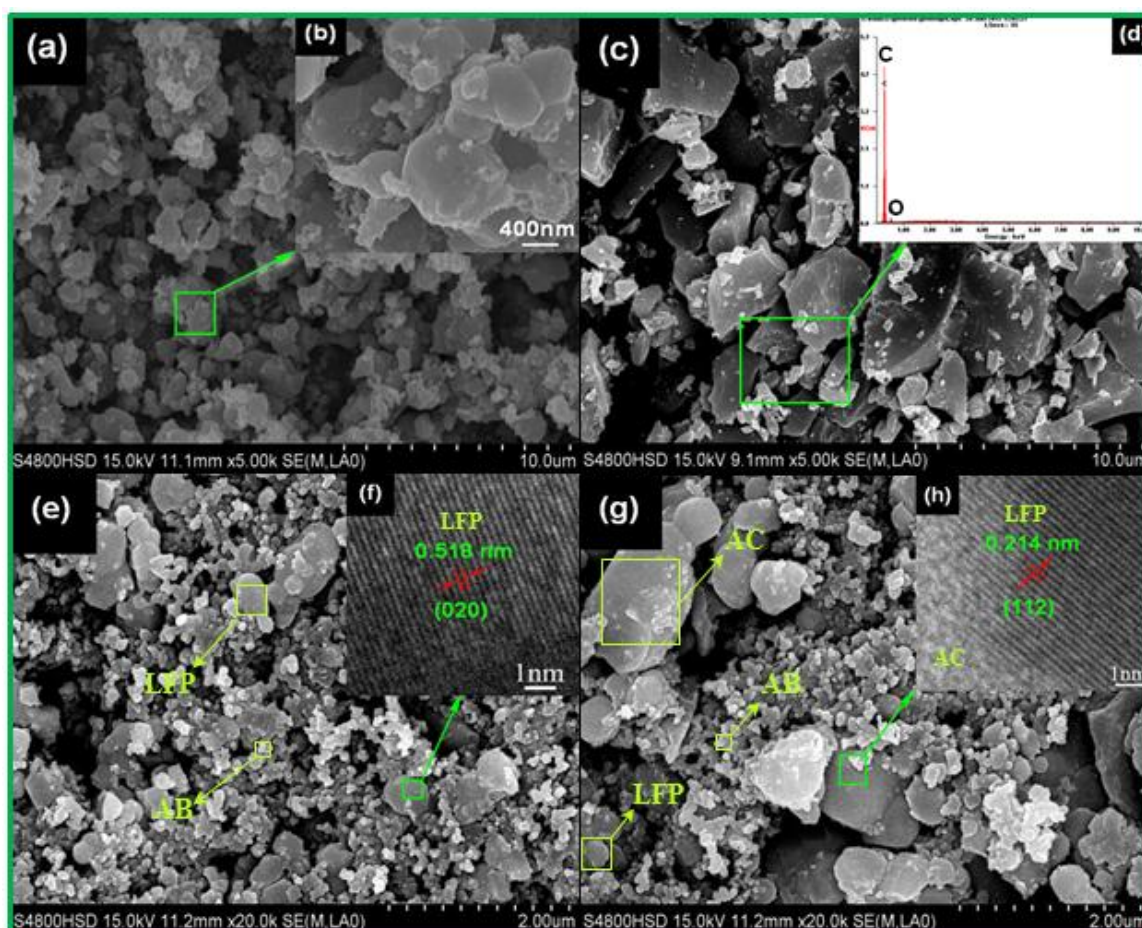

Fig. S4† FESEM images of LFP particles (a, b), AC bulks (c), LFP electrode (e), and 5%LAC electrode (g). EDX spectrum of AC (d). HRTEM images of LFP electrode (f) and 5%LAC electrode (h).

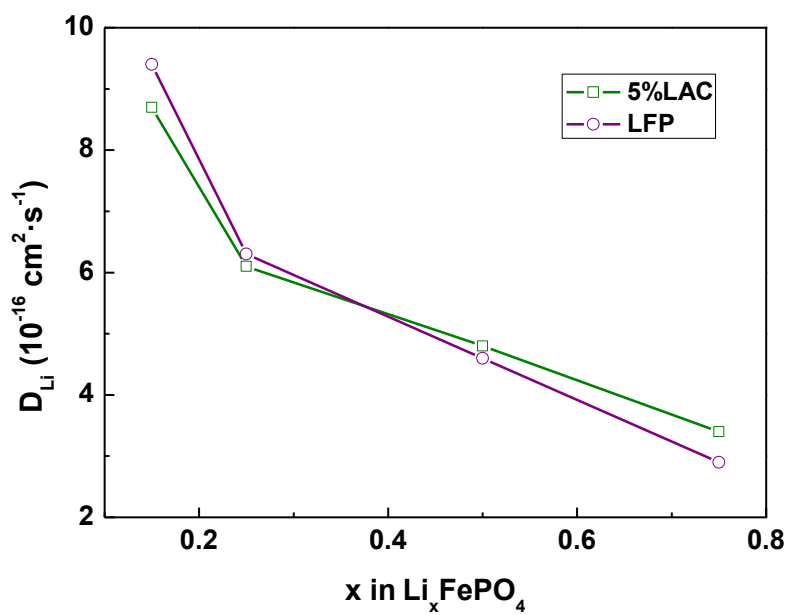

Fig. S5† D<sub>Li</sub> of electrodes LFP and 5%LAC at different SOCs.

Table S1† The BET surface areas and electric conductivities of AC, LFP and 5%LAC

|                                                               | <i>AC</i>               | <i>LFP</i>              | <i>5%LAC</i>            |
|---------------------------------------------------------------|-------------------------|-------------------------|-------------------------|
| <i>BET surface area</i><br>(m <sup>2</sup> .g <sup>-1</sup> ) | 1241.6                  | 9.3                     | 66.4                    |
| <i>Electric conductivity</i><br>(S.cm <sup>-1</sup> )         | 4.62 × 10 <sup>-3</sup> | 1.56 × 10 <sup>-8</sup> | 6.28 × 10 <sup>-6</sup> |
